# Supplementary material for: Multicolor Hair Dyeing with Biocompatible Dark Polyphenol Complex-Integrated Shampoo with Reactive Oxygen Species Scavenging Activity
Source: MDPI journal article supplement (doi:10.3390/biomimetics8060469), 2023-10-01
Supplement: s1 [file s1]

## SUPPORTING INFORMATION

# Multicolor Hair Dyeing with Biocompatible Dark Polyphenol Complex-Integrated Shampoo with Reactive Oxygen Species Scavenging Activity

Tae Min Kim <sup>1,†</sup>, Hyun Jeong Won <sup>1,†</sup>, Jun-Ho Yang <sup>2,†</sup>, Hayeon Jo <sup>1</sup>, A Hyeon Kim <sup>3</sup>, Dohyun Nam <sup>2</sup>, Seul Gi Kim <sup>1</sup>, Eun-Jung Jin <sup>2,\*</sup>, Heung Jin Bae <sup>4,\*</sup> and Sung Young Park <sup>1,3,\*</sup>

<sup>1</sup> Department of Chemical and Biological Engineering, Korea National University of Transportation, Chungju 27469, Republic of Korea; ktm1120@a.ut.ac.kr (T.M.K.); dnjsswh@ut.ac.kr (H.J.W.); yeon81037@ut.ac.kr (H.J.); k.seulgi9797@gmail.com (S.G.K.)

<sup>2</sup> Department of Biological Sciences, College of Health Sciences, Wonkwang University, Iksan 54538, Republic of Korea; skyjun96@gmail.com (J.-H.Y.); dhnam0120@gmail.com (D.N.)

<sup>3</sup> Department of IT and Energy Convergence (BK21 FOUR), Korea National University of Transportation, Chungju 27469, Republic of Korea; dkgusaks@naver.com

<sup>4</sup> MODAMODA Corporation, Ltd., Songpa-gu, Seoul 05546, Republic of Korea

\* Correspondence: jineunjung@wku.ac.kr (E.-J.J.), newseowha@naver.com (H.J.B.) parkchem@ut.ac.kr (S.Y.P.)

<sup>†</sup> These authors contributed equally to this work.



## 1. EXPERIMENTAL SECTION

### *1.1. Investigation of HDP stability using <sup>1</sup>H-NMR and HPLC*

Prior to the investigation, the sample was pre-treated using the following procedures. The HDP sample was dissolved in distilled water with a final concentration of 0.4 mg/mL and stirred for 7 days at 200 rpm. Each sample was treated at different treatment conditions such as room temperature (RT) without and with O<sub>2</sub>, N<sub>2</sub>, and 0.1 N HCl. The solution was lyophilized before analysis.

<sup>1</sup>H-NMR was analyzed using Bruker Avance 400 MHz spectrometer using deuterated-dimethyl sulfoxide (DMSO-d<sub>6</sub>) as the solvents and the concentration of 10 mg/mL. The HPLC was recorded at F&F Tech Co., Ltd. using methanol (MeOH) and 0.1% KH<sub>2</sub>PO<sub>4</sub> in water for HPLC as the mobile phase. OptimapakC-18 (4.6 × 250mm) was used as the stationary phase and the analysis was performed at a measurement temperature of 35 °C, flowrate at 0.8 mL/min, and detection wavelength of 290 nm.



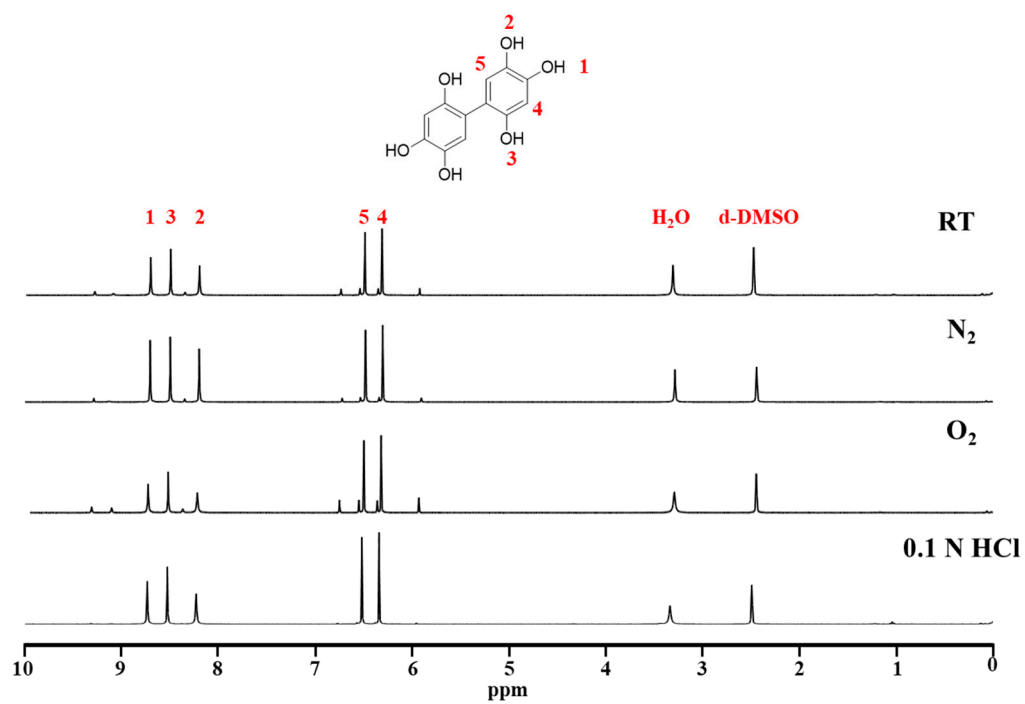

**Figure S1.**  $^1\text{H}$ -NMR spectra of HDP treated in RT,  $\text{O}_2$ ,  $\text{N}_2$ , and HCl 0.1 N.



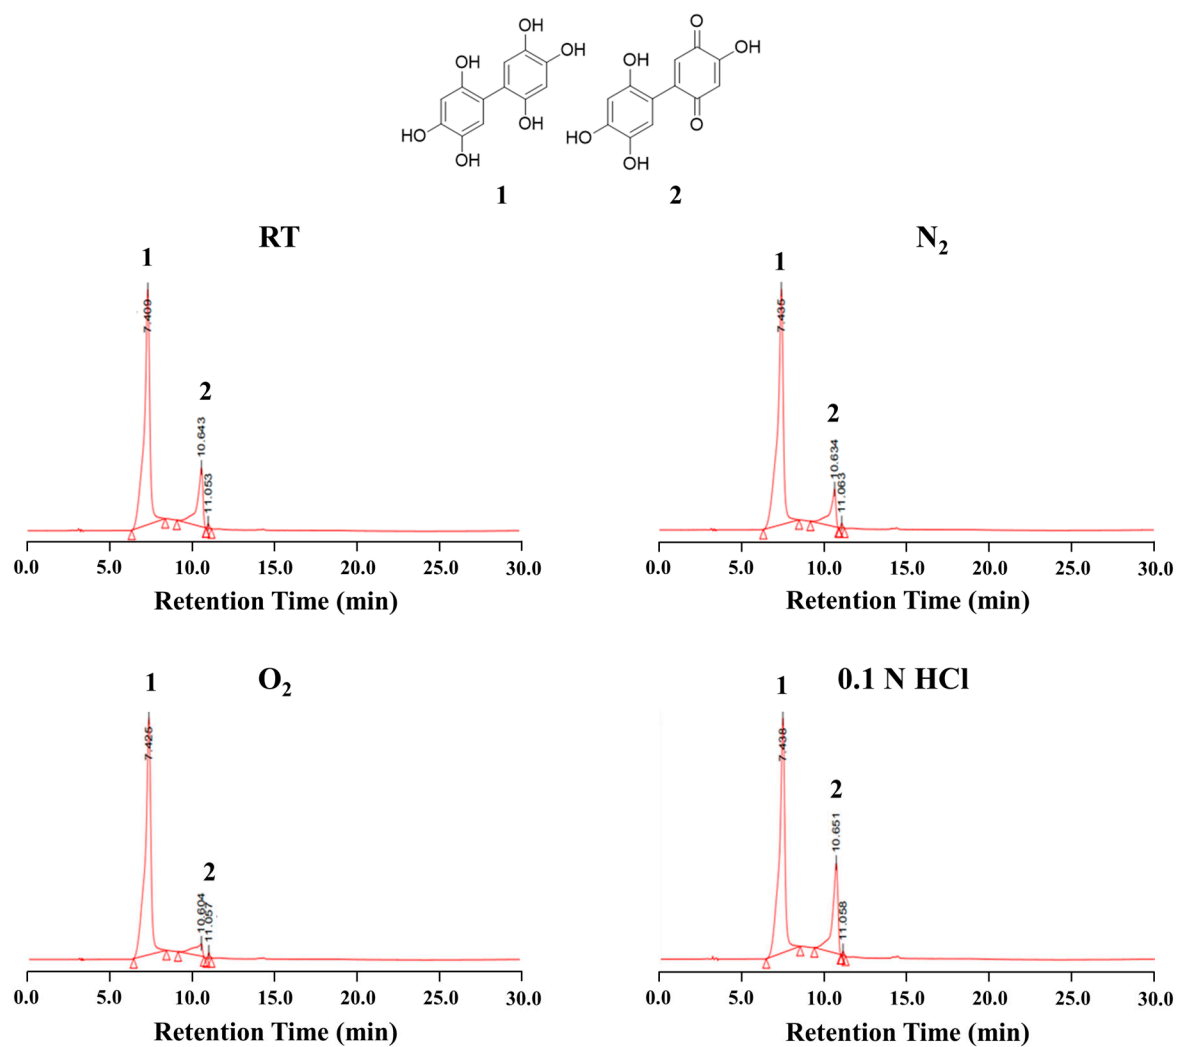

**Figure S2.** HPLC graph of HDP treated in RT, O<sub>2</sub>, N<sub>2</sub>, and HCl 0.1 N.



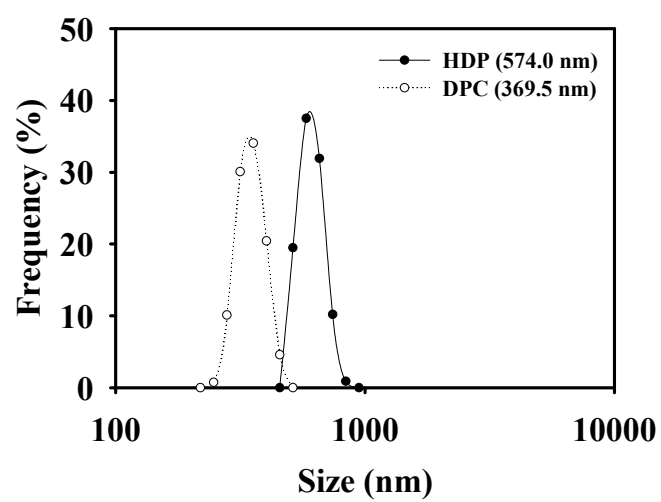

**Figure S3.** DLS spectra of HDP and DPC.



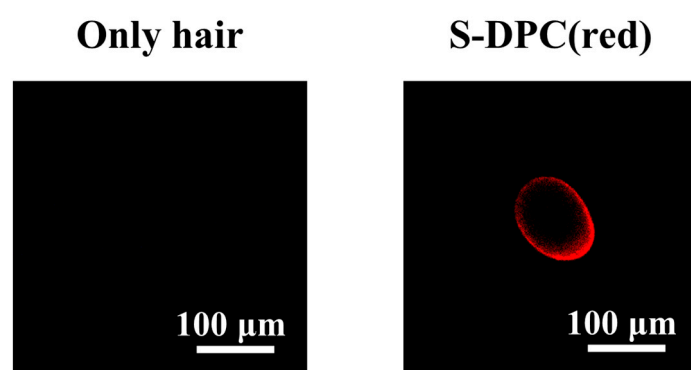

**Figure S4.** Confocal image of cross-section hair and S-DPC(dye)-treated hair.



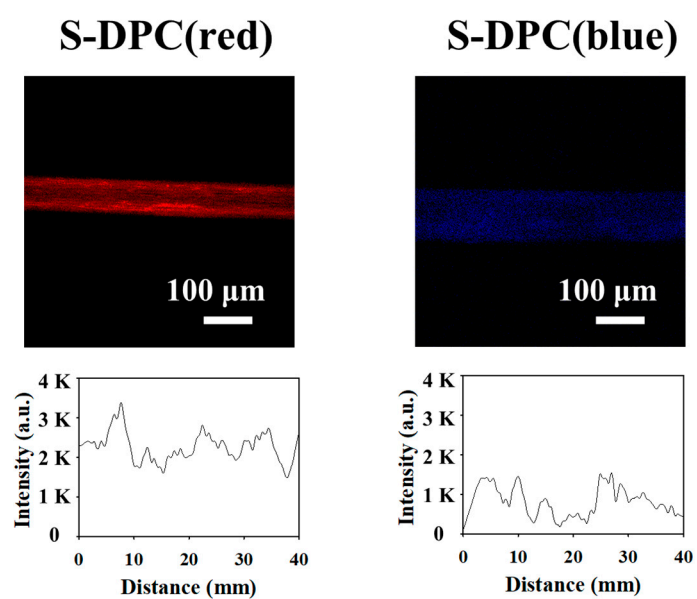

**Figure S5.** Confocal image of S-DPC(dye)-treated hair after subjected to the frequent washing process (10 times).



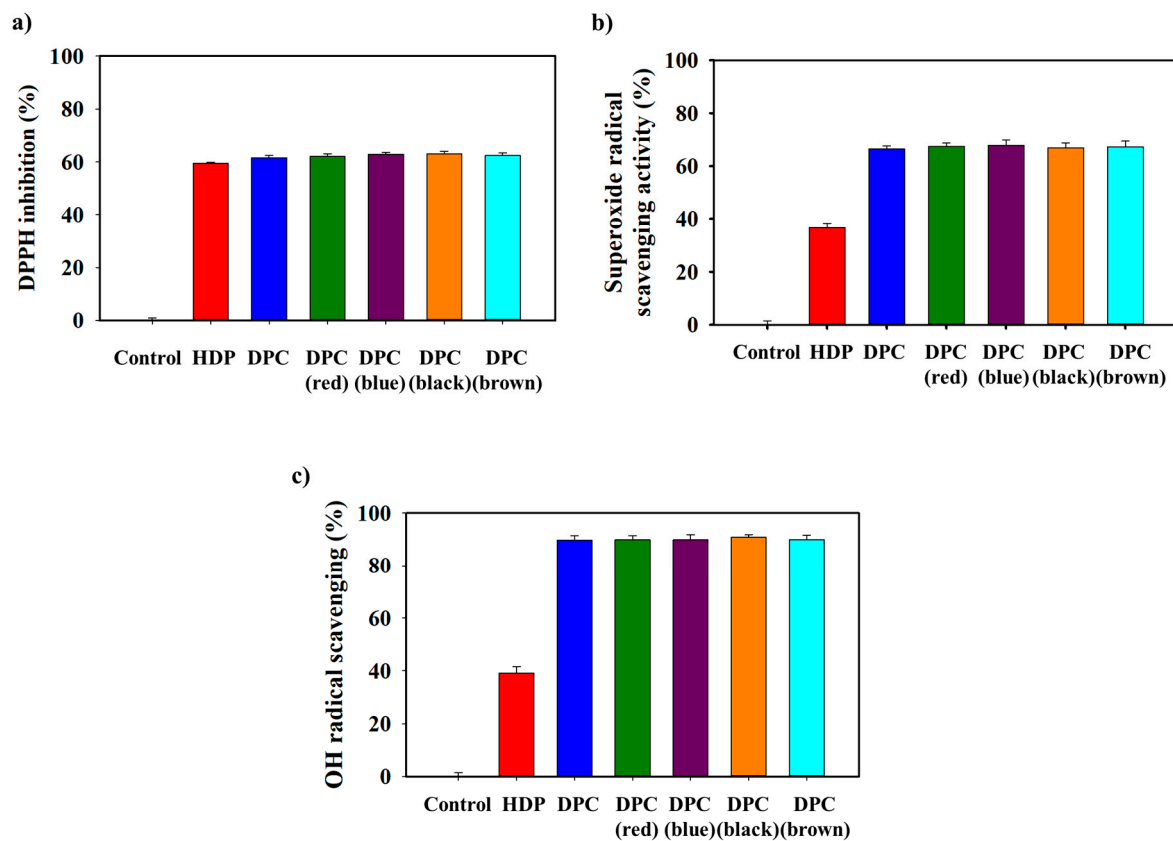

**Figure S6. a) DPPH, b) superoxide ( $O_2^{\bullet-}$ ) and c) hydroxyl radical ( $\bullet OH$ ) scavenging assays of HDP and DPC nanoparticles.**



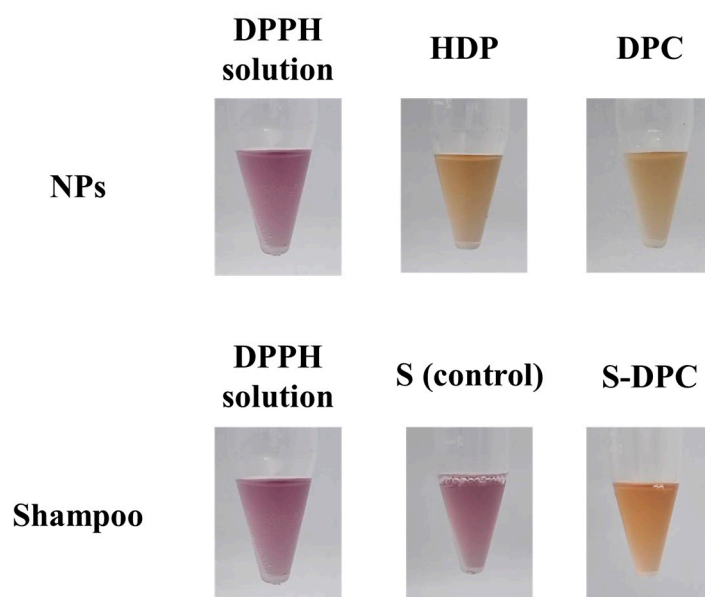

**Figure S7.** Visual of DPPH assay using DPC nanoparticle and DPC shampoo.



**Table S1.** Optimization of DPC synthesis based on weight ratio of HDP, GA and PVA.

| No. | HDP (mg) | GA (mg) | PVA (mg) | DDW (mL) |
|-----|----------|---------|----------|----------|
| 1   | 30       | 3.5     | 14       | 2        |
| 2   | 70       | 3.5     | 14       | 2        |
| 3   | 140      | 3.5     | 14       | 2        |



**Table S2.** Proton ( $^1\text{H}$ ) peak area of HDP treated with various parameters.

| <b>H No.</b> | <b>H peak area of HDP</b> |                      |                      |                  |
|--------------|---------------------------|----------------------|----------------------|------------------|
|              | <b>RT</b>                 | <b>N<sub>2</sub></b> | <b>O<sub>2</sub></b> | <b>0.1 N HCl</b> |
| <b>1</b>     | 1.0                       | 1.0                  | 1.0                  | 1.0              |
| <b>2</b>     | 1.0                       | 1.0                  | 1.0                  | 1.0              |
| <b>3</b>     | 1.0                       | 1.0                  | 1.0                  | 1.0              |
| <b>4</b>     | 1.1                       | 1.1                  | 1.2                  | 1.0              |
| <b>5</b>     | 1.1                       | 1.1                  | 1.2                  | 1.0              |



**Table S3.**  $a^*$  and  $b^*$  values of shampoo only (S control), shampoo with hair dye (S-dye group: S-red, S-blue, S-black, S-brown) and dark polyphenol complex (DPC) shampoo (S-DPC(red), S-DPC(blue), S-DPC(black), S-DPC(brown)).

|                     | $a^*$ value average | $b^*$ value average |
|---------------------|---------------------|---------------------|
| <b>S (control)</b>  | 4.2                 | 15.4                |
| <b>S-red</b>        | 12.8                | 10.7                |
| <b>S-blue</b>       | -7.5                | 7.9                 |
| <b>S-black</b>      | 2.7                 | 9.3                 |
| <b>S-brown</b>      | 8.4                 | 12.8                |
| <b>S-DPC(red)</b>   | 14.1                | 11.6                |
| <b>S-DPC(blue)</b>  | -0.8                | 9.4                 |
| <b>S-DPC(black)</b> | 3.1                 | 10.2                |
| <b>S-DPC(brown)</b> | 5.2                 | 8.7                 |
